# Supplementary material for: Biosynthesis of Selenocysteine on Its tRNA in Eukaryotes
Source: PLOS journal article supplement (doi:10.1371/journal.pbio.0050004), 2006-12-21
Supplement: S1 (10.1371/journal.pbio.0050004.s001) [file journal.pbio.0050004.s001]

Supplemental Information for *PLoS Biology*

## Biosynthesis of Selenocysteine in Eukaryotes

Table S1. Eukaryotes and archaea used in the computational searches.<sup>1</sup>

| Domain           | Phyla          | Organism                           | Selenoprotein-containing organism |
|------------------|----------------|------------------------------------|-----------------------------------|
| <b>Eukaryota</b> |                |                                    |                                   |
|                  | Viridiplantae  | <i>Arabidopsis thaliana</i>        | -                                 |
|                  |                | <i>Oryza sativa</i>                | -                                 |
|                  | Chlorophyta    | <i>Ostreococcus tauri</i>          | +                                 |
|                  |                | <i>Chlamydomonas reinhardtii</i>   | +                                 |
|                  | Apicomplexa    | <i>Cryptosporidium hominis</i>     | -                                 |
|                  |                | <i>Cryptosporidium parvum</i>      | -                                 |
|                  |                | <i>Plasmodium falciparum</i>       | +                                 |
|                  |                | <i>Plasmodium berghei</i>          | +                                 |
|                  |                | <i>Plasmodium yoelii</i>           | +                                 |
|                  |                | <i>Plasmodium chabaudi</i>         | +                                 |
|                  | Dictyosteliida | <i>Dictyostelium discoideum</i>    | +                                 |
|                  | Diplomonadida  | <i>Giardia lamblia</i>             | -                                 |
|                  | Entamoebidae   | <i>Entamoeba histolytica</i>       | -                                 |
|                  |                | <i>Entamoeba dispar</i>            | -                                 |
|                  | Fungi          | <i>Neurospora crassa</i>           | -                                 |
|                  |                | <i>Aspergillus fumigatus</i>       | -                                 |
|                  |                | <i>Hypocrea jecorina</i>           | -                                 |
|                  |                | <i>Candida albicans</i>            | -                                 |
|                  |                | <i>Debaryomyces hansenii</i>       | -                                 |
|                  |                | <i>Eremothecium gossypii</i>       | -                                 |
|                  |                | <i>Kluyveromyces lactis</i>        | -                                 |
|                  |                | <i>Yarrowia lipolytica</i>         | -                                 |
|                  |                | <i>Saccharomyces cerevisiae</i>    | -                                 |
|                  |                | <i>Schizosaccharomyces pombe</i>   | -                                 |
|                  |                | <i>Cryptococcus neoformans</i>     | -                                 |
|                  |                | <i>Ustilago maydis</i>             | -                                 |
|                  |                | <i>Phanerochaete chrysosporium</i> | -                                 |
|                  |                | <i>Encephalitozoon cuniculi</i>    | -                                 |
|                  | Metazoa        | <i>Ciona intestinalis</i>          | +                                 |
|                  |                | <i>Danio rerio</i>                 | +                                 |
|                  |                | <i>Takifugu rubripes</i>           | +                                 |
|                  |                | <i>Tetraodon nigroviridis</i>      | +                                 |
|                  |                | <i>Drosophila melanogaster</i>     | +                                 |
|                  |                | <i>Anopheles gambiae</i>           | +                                 |
|                  |                | <i>Bombyx mori</i>                 | +                                 |
|                  |                | <i>Gallus gallus</i>               | +                                 |
|                  |                | <i>Xenopus tropicalis</i>          | +                                 |

|                    |                                   |   |
|--------------------|-----------------------------------|---|
|                    | <i>Caenorhabditis elegans</i>     | + |
|                    | <i>Homo sapiens</i>               | + |
|                    | <i>Mus musculus</i>               | + |
|                    | <i>Rattus norvegicus</i>          | + |
| Kinetoplastida     | <i>Leishmania major</i>           | + |
|                    | <i>Trypanosoma brucei</i>         | + |
|                    | <i>Trypanosoma cruzi</i>          | + |
| Stramenopiles      | <i>Thalassiosira pseudonana</i>   | + |
|                    | <i>Phytophthora ramorum</i>       | + |
|                    | <i>Phytophthora sojae</i>         | + |
| Alveolata          | <i>Theileria parva</i>            | - |
|                    | <i>Paramecium tetraurelia</i>     | - |
| Cryptophyta        | <i>Guillardia theta</i>           | - |
| <b>Archaea</b>     |                                   |   |
| Desulfurococcales  | <i>Aeropyrum pernix</i>           | - |
| Sulfolobales       | <i>Sulfolobus acidocaldarius</i>  | - |
|                    | <i>Sulfolobus solfataricus</i>    | - |
|                    | <i>Sulfolobus tokodaii</i>        | - |
| Thermoproteales    | <i>Pyrobaculum aerophilum</i>     | - |
| Archaeoglobales    | <i>Archaeoglobus fulgidus</i>     | - |
| Halobacteriales    | <i>Haloarcula marismortui</i>     | - |
|                    | <i>Halobacterium sp.</i>          | - |
|                    | <i>Natronomonas pharaonis</i>     | - |
| Methanobacteriales | <i>Methanosphaera stadtmanae</i>  | - |
|                    | <i>Methanothermobacter</i>        | - |
|                    | <i>thermautotrophicus</i>         | - |
| Methanococcales    | <i>Methanocaldococcus</i>         | + |
|                    | <i>jannaschii</i>                 | + |
|                    | <i>Methanococcus maripaludis</i>  | + |
| Methanomicrobiales | <i>Methanospirillum hungatei</i>  | - |
| Methanopyrales     | <i>Methanopyrus kandleri</i>      | + |
| Methanosarcinales  | <i>Methanococcoides burtonii</i>  | - |
|                    | <i>Methanosarcina acetivorans</i> | - |
|                    | <i>Methanosarcina barkeri</i>     | - |
|                    | <i>Methanosarcina mazei</i>       | - |
| Thermococcales     | <i>Pyrococcus abyssi</i>          | - |
|                    | <i>Pyrococcus furiosus</i>        | - |
|                    | <i>Pyrococcus horikoshii</i>      | - |
|                    | <i>Thermococcus kodakaraensis</i> | - |
| Thermoplasmatales  | <i>Picrophilus torridus</i>       | - |
|                    | <i>Thermoplasma acidophilum</i>   | - |
|                    | <i>Thermoplasma volcanium</i>     | - |
| Nanoarchaeota      | <i>Nanoarchaeum equitans</i>      | - |

<sup>1</sup>50 eukaryotes and 27 archaea were used in these searches.
